# Supplementary material for: Systematic mapping of rRNA 2’-O methylation during frog development and involvement of the methyltransferase Fibrillarin in eye and craniofacial development in Xenopus laevis
Source: PLoS Genet. 2022 Jan 18;18(1):e1010012. doi: 10.1371/journal.pgen.1010012 (PMC8797249; doi:10.1371/journal.pgen.1010012)
Supplement: S1 Data — Primary data used to produce the graph in S2 Fig. (XLSX) [file pgen.1010012.s011.xlsx]

## Sheet: Feuil1
S1 Data: Relative retinal pigmented epithelium (RPE) area
RPE area were measured for each eye of embryo and a ratio of injected side versus non-injected side was calculated.
0 = no RPE in injected side.
	Ctrl MO	ubtf MO	ncl MO	fbl MO	fbl MO + fblΔ5'UTR
	98.0523	78.6598	78.4964	87.0877	64.6458
	93.8962	14.1521	63.7486	90.5361	98.2485
	91.7778	91.3073	99.1323	87.6788	79.3823
	93.5963	94.9806	96.8578	87.098	93.8449
	91.8634	64.1087	90.3306	50.7964	97.9079
	94.473	98.9937	75.8893	84.6721	77.9743
	94.7959	40.9194	87.4988	86.766	92.4503
	96.1916	55.5899	96.503	89.3732	97.1429
	96.0004	30.0132	90.5289	84.683	99.0362
	88.5417	94.1145	89.1055	93.6031	91.7617
	98.6432	72.6811	43.0134	80.5376	98.8095
	95.9031	93.7652	65.3057	81.4711	96.1589
	92.0709	99.504	70.3301	95.6452	96.5306
	95.1476	93.1094	98.1711	82.846	99.5381
	95.9306	95.3229	54.9968	90.147	92.6223
	95.4337	47.9671	70.4367	85.8575	97.0608
	91.128	97.5062	59.7963	90.9056	76.124
	93.3585	98.2886	65.4586	96.8872	88.0986
	96.0388	41.8441	60.6714	74.535	99.1567
	94.59	97.7227	68.9718	73.5649	92.7105
	98.7116	97.1182	53.8127	80.4815	98.2922
	97.2985	0	73.5035	63.89	95.4861
	92.3314	96.1358	57.0074	70.6727	85.2747
	99.4545	24.2356	86.1277	88.5172	99.7517
	97.2793	96.3759	76.0861	69.9097	91.4698
	97.3278	57.7955	61.3163	84.0174	99.6779
	92.0241	37.4256	58.9291	87.8375	94.7636
	93.1866	74.9577	88.5095	81.3927	83.8762
	98.4485	96.5511	68.0893	77.4244	68.6342
	98.3816	51.1861	55.6661	73.4938	85.8775
	95.349	0	58.4181	81.9995	99.1098
	93.5415	48.5325	44.3179	93.8119	94.1954
	93.7771	99.7589	98.212	88.9086	99.8392
	94.1205	98.7479	90.9656	0	94.8529
	92.0603	93.8555	67.6438	94.6629	82.0611
	90.4567	77.2549	56.4124	88.0191	99.1701
	99.3499	97.4645	84.3039	96.4686	95.8854
	92.3916	96.6715	83.5247	90.8706	92.2539
	90.0324	79.2142	79.0159	86.3242	92.2141
	96.1293	35.317	71.7389	98.8346	67.5475
	96.9719	97.0375	90.8249	94.4815	97.231
	97.228	13.6933	93.3876	78.7425	97.5981
	99.2169	78.9228	68.5743	72.5589	92.2194
	94.1461	77.8675	75.3588	66.27	90.1668
	95.0605	70.0667	95.9518	90.1554	94.2924
	94.107	98.8096	76.7502	90.9153	88.27
	95.0289	97.5439	99.2215	57.7272	94.108
	95.486	0	95.161	98.131	93.3248
	97.6535	0	90.128	96.7335	97.1081
	98.0261	0	75.8909	97.3469	98.006
	94.6827	92.3522	86.3465	78.9895	98.4873
	97.7043	68.7417	91.7425	88.8556	95.3488
	98.1302	0	87.8697	92.6042	87.3409
	95.7878	0	37.7103	75.3065	95.9075
	90.9636	0	86.4731	99.8079	93.1639
	95.7098	91.8063	91.7345	75.9534	81.17
	97.2219	97.8182	50.6733	91.0438	95.46
	88.2386	48.7811	83.4063	93.7585	87.092
	97.9517	94.6429	96.8238	94.9919	97.716
	98.2797	82.131	70.1861	94.2573	87.0618
	94.6697	74.7679	75.4675	94.2573	88.4762
	95.8269	85.8991	63.2092	96.947	98.8754
	98.5119	96.9817	54.1861	58.8905	98.0752
	94.7951	43.9946	79.9613	96.0898	92.1733
	95.3376	95.3289	99.3802	83.536	90.473
	99.6251	39.7628	23.4502	91.9686	96.0123
	95.8949	95.2752	39.8068	79.6672	99.1412
	91.7467	81.4731	82.0236	96.0356	89.4334
		37.164	96.1888	99.7546	97.3333
		66.2471	62.5575	89.7621	92.7076
		94.3934	78.8226	61.7304	99.0269
		32.8211	97.7231	85.4072	92.4749
		98.325	91.8083	84.2528	97.9046
		96.6154	75.6415	76.2458	66.8639
		99.8466	98.8892	93.0716	91.7443
		96.4181	90.9003	91.7303	93.2382
		87.7361	89.3634	73.818	95.5473
		95.1923		89.8112	99.871
		92.2455		76.4005	63.141
		82.8348		55.927	85.525
		98.0886		77.8406	98.5507
		99.7908		99.822	90.1028
		95.2972		84.7525	87.2699
		84.047		86.787	79.6784
		85.7327		92.5875	88.6731
		92.0865		88.2892	31.6681
		97.6325		96.6476	73.9362
		67.9102		95.0717
		89.4435		81.373
		51.2059		71.6376
		91.7223		94.6393
				67.9648
				97.8751
				99.4837
				82.9803
				91.1527
				92.775
				91.366
				80.0828
				89.5185
				77.9664
				65.5284
				98.0046
				99.9232
				96.7343
				73.1955
				96.6271
				73.321
				97.7527
				67.6903
				88.5659
				84.9542
				71.138
				93.7666
				90.1155
				96.1193
				83.7083
				86.045
				77.6392
				97.0076
				84.5664
				88.3232
				92.5969
				95.6911
				80.1024
				80.6218
				88.9966
				76.3944
				98.5066
				97.2584
				85.3317
				98.2004
				85.4463
				98.2466
				96.8177
				93.1782
				95.1487
				75.2976
				88.1263
				97.9142
				96.9651
				79.9195
				80.3867
				84.2656
				80.5478
				99.5856
				83.0313
				98.7413
				97.8927
				89.1671
				98.7654
				91.1302
				74.5628
				80.9942
